# Supplementary material
Source: publisher figshare collection journal article supplement (https://geolsoc.figshare.com/articles/dataset/_/3454391)

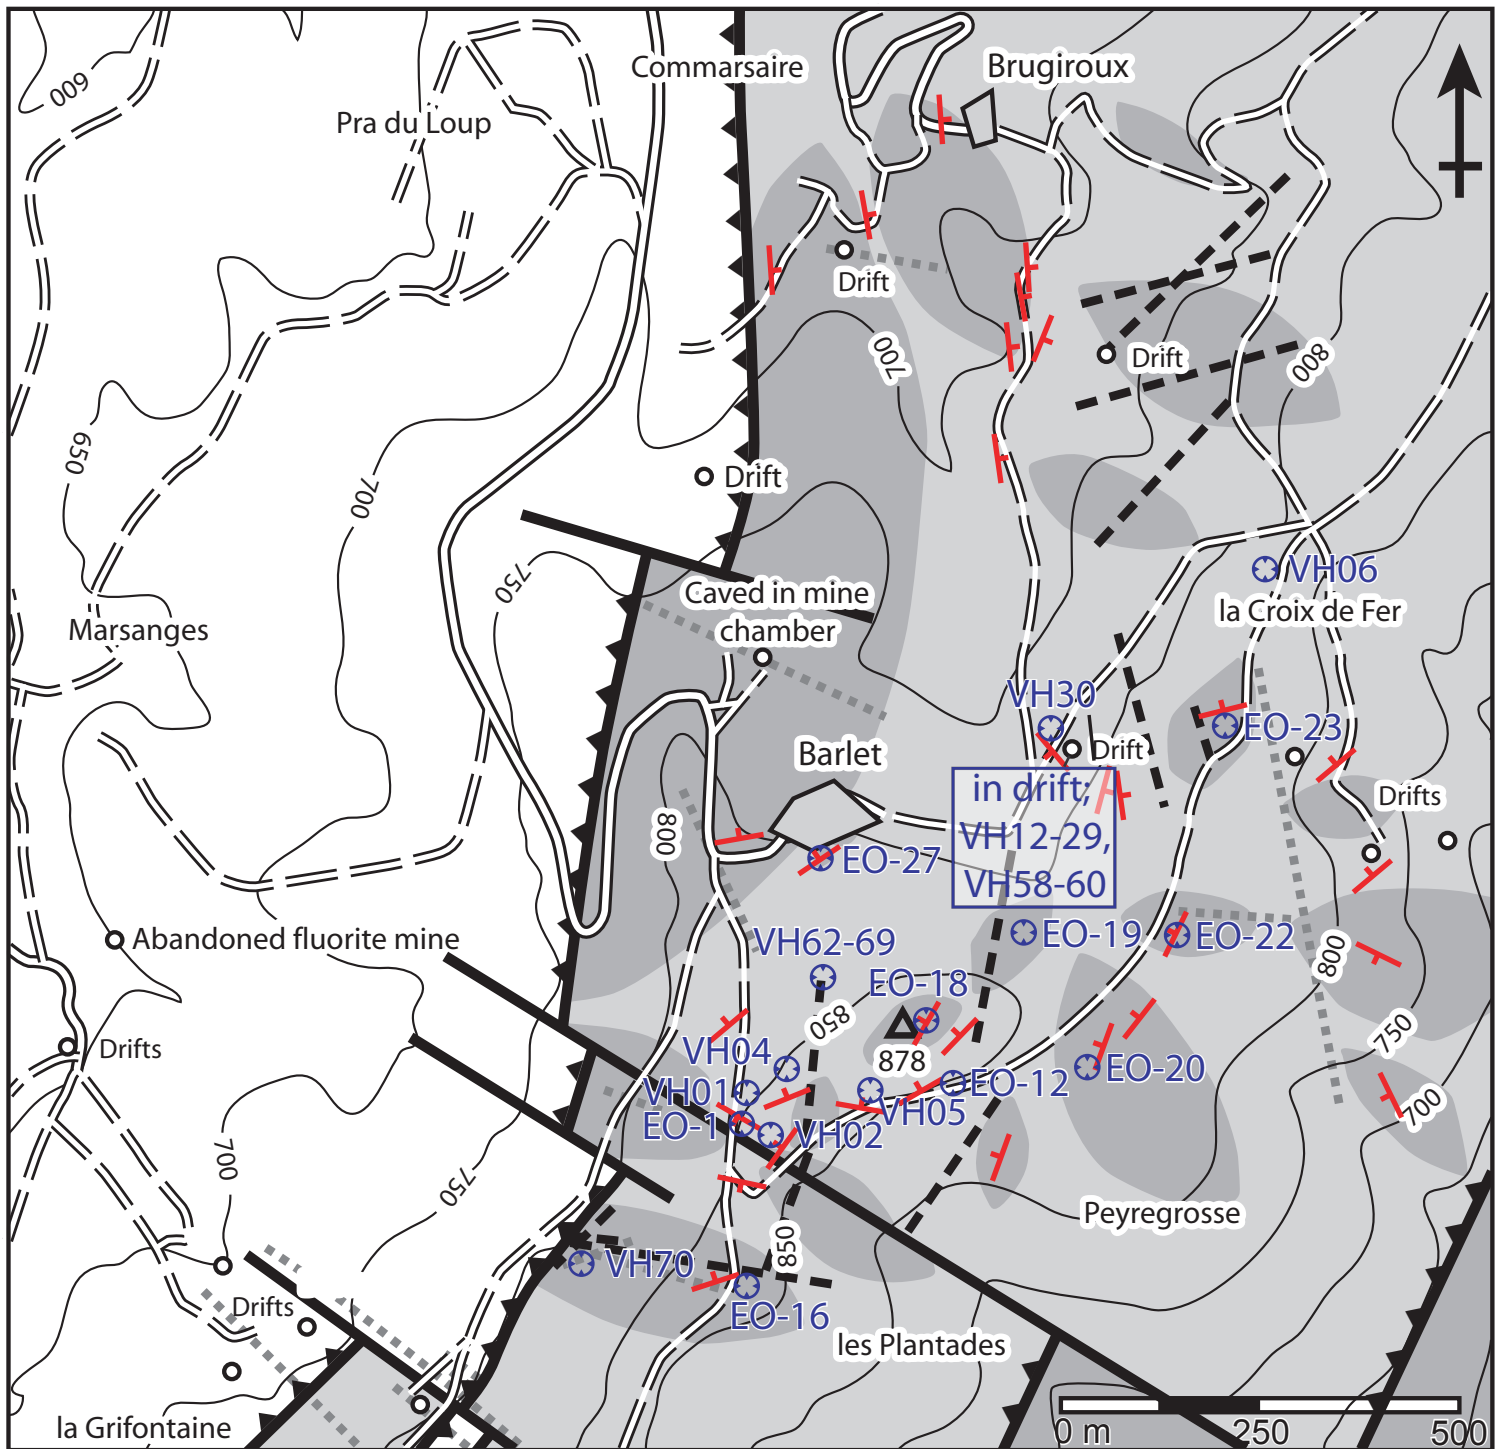

Geological map of the Barlet area with sample localities and selected structural measurements

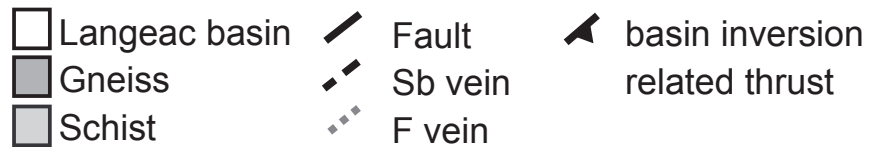

Schematic geological cross-section from the village of Lestival to Pebrac.

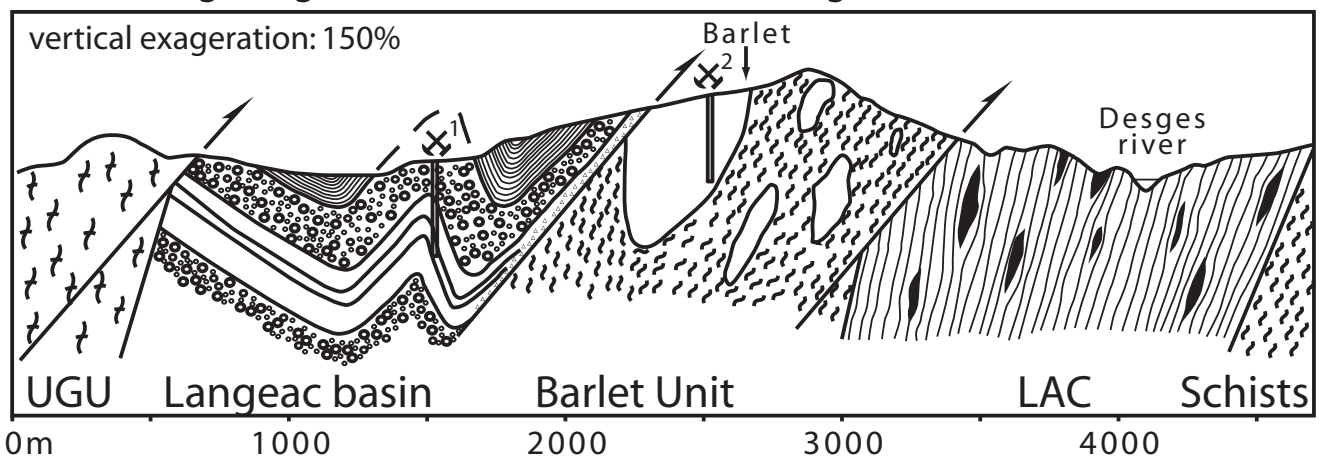

Supplement: Supplementary file 1 [file 1]
